# Supplementary material for: Iodine Content of Wild and Farmed Seafood and Its Estimated Contribution to UK Dietary Iodine Intake
Source: MDPI journal article supplement (doi:10.3390/nu14010195), 2021-12-31
Supplement: s1 [file s1]

**Supplementary Table S1.** Mean, SD, median and range (min-max) of iodine contents ( $\mu\text{g}\cdot 100\text{ g}^{-1}$  flesh ww) analysed in the 95 seafood samples in the current study and their contribution to a weekly 980  $\mu\text{g}$  recommended intake for iodine in UK adults, based on the 140  $\mu\text{g}$  RNI and a suggested 140 g seafood serving size [6,28]. All samples analysed raw unless indicated by \*. Refer to Table 1 for species scientific name and farmed/wild-catch location.

| Common name                       | Wild/<br>Farmed | Iodine (µg.100 g <sup>-1</sup> flesh) |        |        |                    | % RWI,<br>140g serv-<br>ing | n |
|-----------------------------------|-----------------|---------------------------------------|--------|--------|--------------------|-----------------------------|---|
|                                   |                 | Mean                                  | SD     | Median | Range<br>(min-max) |                             |   |
| FRESHWATER FISH                   |                 |                                       |        |        |                    |                             |   |
| Arctic char                       | Farmed          | 18.72                                 | 6.33   | 20.14  | 10.01-24.59        | 2.67                        | 4 |
| Common carp                       | Farmed          | 2.97                                  | 1.58   | 2.67   | 1.13-3.34          | 0.42                        | 5 |
| Milkfish                          | Farmed          | 8.50                                  | 3.53   | 7.30   | 5.83-13.58         | 1.21                        | 4 |
| Nile tilapia                      | Farmed          | 4.71                                  | 1.90   | 4.48   | 3.00-6.90          | 0.67                        | 4 |
| Rainbow trout                     | Farmed          | 11.64                                 | 9.17   | 10.43  | 2.99-26.46         | 1.66                        | 5 |
| Siberian sturgeon                 | Farmed          | 8.69                                  | 1.32   | 8.96   | 6.84-9.99          | 1.24                        | 4 |
| Striped catfish (Basa, Pangasius) | Farmed          | 6.16                                  | 3.46   | 4.88   | 2.95-10.95         | 0.88                        | 5 |
| Zander (pike-perch)               | Wild            | 5.77                                  | 0.96   | 5.43   | 5.03-7.18          | 0.82                        | 4 |
| MARINE FISH                       |                 |                                       |        |        |                    |                             |   |
| <i>Anguilliformes</i>             |                 |                                       |        |        |                    |                             |   |
| Daggertooth pike conger           | Wild            | 25.16                                 | 10.96  | 20.44  | 18.25-41.53        | 3.59                        | 4 |
| European conger                   | Wild            | 18.63                                 | 4.44   | 19.08  | 13.60-22.76        | 2.66                        | 4 |
| <i>Clupeiformes</i>               |                 |                                       |        |        |                    |                             |   |
| Atlantic herring                  | Wild            | 30.41                                 | 25.08  | 16.76  | 11.90-69.70        | 4.34                        | 7 |
| European anchovy                  | Wild            | 32.73                                 | 2.20   | 31.66  | 31.26-35.26        | 4.68                        | 3 |
| European pilchard (sardine)       | Wild            | 24.77                                 | 4.45   | 24.78  | 18.26-30.45        | 3.54                        | 5 |
| European sprat                    | Wild            | 20.44                                 | 6.42   | 19.52  | 10.83-29.46        | 2.92                        | 6 |
| <i>Gadiformes</i>                 |                 |                                       |        |        |                    |                             |   |
| Atlantic cod                      | Wild            | 70.72                                 | 18.96  | 74.35  | 40.33-94.26        | 10.10                       | 6 |
| Alaskan Pollock                   | Wild            | 56.83                                 | 9.13   | 53.50  | 49.83-67.17        | 8.12                        | 3 |
| Cape hake                         | Wild            | 9.67                                  | 4.93   | 7.99   | 5.97-16.74         | 1.38                        | 4 |
| European hake                     | Wild            | 13.84                                 | 7.98   | 10.31  | 8.96-25.78         | 1.98                        | 4 |
| Haddock                           | Wild            | 427.38                                | 316.09 | 323.27 | 80.77-909.77       | 61.05                       | 5 |
| Ling                              | Wild            | 54.88                                 | 33.66  | 63.11  | 16.66-87.96        | 7.84                        | 5 |
| Pollack (Atlantic Pollock)        | Wild            | 76.05                                 | 24.65  | 72.48  | 53.38-102.29       | 10.86                       | 3 |
| Pouting                           | Wild            | 82.04                                 | 26.65  | 89.11  | 52.56-104.44       | 11.72                       | 3 |
| Saithe (Coley)                    | Wild            | 85.81                                 | 31.19  | 95.28  | 42.15-110.53       | 12.26                       | 4 |
| Whiting                           | Wild            | 62.49                                 | 24.77  | 52.83  | 34.62-99.18        | 8.93                        | 5 |
| <i>Lophiiformes</i>               |                 |                                       |        |        |                    |                             |   |
| Monkfish                          | Wild            | 33.35                                 | 11.18  | 33.56  | 21.95-44.34        | 4.76                        | 4 |
| <i>Mugiliformes</i>               |                 |                                       |        |        |                    |                             |   |
| Flathead grey mullet              | Wild            | 52.21                                 | 81.53  | 21.89  | 7.18-197.26        | 7.46                        | 5 |
| Thicklip grey mullet              | Wild            | 13.66                                 | 1.24   | 13.67  | 12.14-15.15        | 1.95                        | 4 |

*Percoidei*

|                                |        |       |       |       |             |      |   |
|--------------------------------|--------|-------|-------|-------|-------------|------|---|
| Atlantic horse mackerel        | Wild   | 22.85 | 2.06  | 22.12 | 21.25-25.18 | 3.26 | 3 |
| Barramundi (Asian seabass)     | Farmed | 10.15 | 3.92  | 10.27 | 5.94-12.87  | 1.45 | 6 |
| Black seabream                 | Wild   | 53.88 | 23.19 | 52.32 | 27.37-95-78 | 7.70 | 6 |
| European seabass               | Wild   | 36.11 | 15.97 | 37.06 | 16.42-53.89 | 5.16 | 4 |
|                                | Farmed | 12.18 | 3.10  | 12.50 | 8.13-16.11  | 1.74 | 6 |
| Gilthead seabream              | Farmed | 12.03 | 2.82  | 12.13 | 7.23-15.29  | 1.72 | 6 |
| Meagre                         | Farmed | 15.33 | 5.57  | 17.06 | 7.56-19.66  | 2.19 | 4 |
| Red mullet (Indian goatfish)   | Wild   | 21.76 | 6.35  | 19.44 | 13.71-33.04 | 3.11 | 8 |
| Red snapper                    | Wild   | 19.04 | 6.42  | 18.48 | 12.52-26.69 | 2.72 | 4 |
| White trevally (Trevally jack) | Wild   | 17.11 | 1.38  | 17.59 | 15.56-18.20 | 2.44 | 3 |
| Yellow croaker                 | Wild   | 11.11 | 1.76  | 10.76 | 9.55-13.01  | 1.59 | 3 |

*Pleuronectiformes*

|                  |        |       |       |       |             |      |   |
|------------------|--------|-------|-------|-------|-------------|------|---|
| Atlantic halibut | Wild   | 20.37 | 8.61  | 18.80 | 11.07-32.23 | 2.91 | 7 |
|                  | Farmed | 35.35 | 10.90 | 34.33 | 22.13-49.61 | 5.05 | 6 |
| Brill            | Wild   | 21.77 | 4.80  | 23.72 | 15.63-27.52 | 3.11 | 5 |

**Supplementary Table S1 Cont.**

| Common name                    | Wild/<br>Farmed | Iodine (µg.100 g <sup>-1</sup> flesh) |       |        |                    | % RWI,<br>140g serv-<br>ing | n  |
|--------------------------------|-----------------|---------------------------------------|-------|--------|--------------------|-----------------------------|----|
|                                |                 | Mean                                  | SD    | Median | Range<br>(min-max) |                             |    |
| MARINE FISH Cont.              |                 |                                       |       |        |                    |                             |    |
| <i>Pleuronectiformes cont.</i> |                 |                                       |       |        |                    |                             |    |
| Common dab                     | Wild            | 16.71                                 | 2.94  | 16.71  | 13.14-20.28        | 2.39                        | 4  |
| Common sole (Dover sole)       | Wild            | 25.18                                 | 13.37 | 21.38  | 13.38-47.26        | 3.60                        | 7  |
| European flounder              | Wild            | 20.29                                 | 11.13 | 20.36  | 9.34-31.11         | 2.90                        | 4  |
| European plaice                | Wild            | 15.52                                 | 6.58  | 13.90  | 9.83-26.65         | 2.22                        | 6  |
| Lemon sole                     | Wild            | 26.12                                 | 26.39 | 15.54  | 7.07-84.09         | 3.73                        | 7  |
| Megrim                         | Wild            | 17.71                                 | 9.90  | 17.18  | 7.75-28.72         | 2.53                        | 4  |
| Turbot                         | Wild            | 52.01                                 | 39.87 | 34.60  | 13.91-103.01       | 7.43                        | 5  |
|                                | Farmed          | 32.42                                 | 6.36  | 30.65  | 26.74-43.38        | 4.63                        | 5  |
| Witch flounder (Witch sole)    | Wild            | 41.38                                 | 5.88  | 41.62  | 33.39-49.89        | 5.91                        | 5  |
| Yellowfin sole                 | Wild            | 22.55                                 | 9.58  | 20.36  | 14.25-33.03        | 3.22                        | 3  |
| <i>Rajiformes</i>              |                 |                                       |       |        |                    |                             |    |
| Ray wings                      | Wild            | 16.63                                 | 4.72  | 16.62  | 10.88-22.42        | 2.38                        | 4  |
| <i>Salmoniformes</i>           |                 |                                       |       |        |                    |                             |    |
| Atlantic salmon                | Wild            | 16.95                                 | 3.97  | 16.98  | 11.95-23.21        | 2.42                        | 6  |
|                                | Farmed          | 13.21                                 | 6.78  | 12.14  | 4.54-33.59         | 1.89                        | 32 |
| Keta salmon (Chum salmon)      | Wild            | 12.34                                 | 2.06  | 12.87  | 9.90-14.80         | 1.76                        | 5  |
| Pink salmon (Humpback salmon)  | Wild            | 10.41                                 | 3.72  | 9.85   | 6.82-15.13         | 1.49                        | 4  |
| Rainbow trout                  | Farmed          | 10.71                                 | 5.46  | 8.57   | 7.11-20.35         | 1.53                        | 5  |
| Sea trout                      | Wild            | 17.31                                 | 3.42  | 16.86  | 14.14-21.40        | 2.47                        | 4  |
| Sockeye salmon (Red salmon)    | Wild            | 24.87                                 | 8.84  | 13.25  | 16.39-34.39        | 3.55                        | 6  |

**Scombroidei**

|                               |      |       |       |       |             |      |   |
|-------------------------------|------|-------|-------|-------|-------------|------|---|
| Albacore tuna                 | Wild | 9.81  | 2.29  | 9.35  | 7.82-13.29  | 1.40 | 5 |
| Atlantic mackerel             | Wild | 34.35 | 17.05 | 23.25 | 17.48-52.08 | 4.91 | 7 |
| Black marlin                  | Wild | 9.82  | 2.86  | 8.30  | 7.41-14.35  | 1.40 | 5 |
| Largehead hairtail (Beltfish) | Wild | 14.02 | 1.35  | 14.40 | 12.53-15.15 | 2.00 | 3 |
| Savalai hairtail (Ribbonfish) | Wild | 12.56 | 0.32  | 12.53 | 12.25-12.90 | 1.79 | 3 |
| Swordfish                     | Wild | 15.15 | 4.87  | 16.50 | 7.11-19.60  | 2.16 | 5 |
| Wahoo (Kingfish)              | Wild | 28.60 | 15.76 | 24.86 | 15.11-49.57 | 4.09 | 4 |
| Yellowfin tuna                | Wild | 9.31  | 3.60  | 7.87  | 6.04-15.99  | 1.33 | 6 |

**Scorpaeniformes**

|                          |      |       |       |       |             |      |   |
|--------------------------|------|-------|-------|-------|-------------|------|---|
| Gurnard                  | Wild | 30.36 | 15.95 | 25.98 | 17.77-66.43 | 4.34 | 8 |
| Redfish (Norway redfish) | Wild | 11.50 | 2.38  | 11.99 | 8.42-13.62  | 1.64 | 4 |

**Stromateoidei, Anabantoidei**

|                |      |      |      |      |           |      |   |
|----------------|------|------|------|------|-----------|------|---|
| Silver pomfret | Wild | 5.35 | 0.99 | 5.40 | 4.12-6.48 | 0.76 | 4 |
|----------------|------|------|------|------|-----------|------|---|

**Squaliformes**

|                       |      |       |      |       |             |      |   |
|-----------------------|------|-------|------|-------|-------------|------|---|
| Picked dogfish (huss) | Wild | 26.29 | 8.37 | 30.45 | 16.65-31.76 | 3.76 | 3 |
|-----------------------|------|-------|------|-------|-------------|------|---|

**Zeiformes**

|                              |      |       |      |       |            |      |   |
|------------------------------|------|-------|------|-------|------------|------|---|
| John dory                    | Wild | 15.99 | 5.79 | 14.60 | 9.17-27.81 | 2.28 | 7 |
| Oreo dory (Smooth oreo dory) | Wild | 7.66  | 6.69 | 4.80  | 3.49-19.51 | 1.09 | 5 |

**Zoarcoidei**

|                   |      |       |       |       |             |      |   |
|-------------------|------|-------|-------|-------|-------------|------|---|
| Atlantic wolffish | Wild | 38.34 | 29.34 | 36.95 | 12.75-66.71 | 5.48 | 4 |
|-------------------|------|-------|-------|-------|-------------|------|---|

**SHELLFISH****Crustaceans**

|                               |        |        |        |        |               |       |   |
|-------------------------------|--------|--------|--------|--------|---------------|-------|---|
| American lobster              | Wild   | 104.63 | 41.05  | 96.36  | 69.28-156.52  | 14.95 | 4 |
| *Edible crab – whole          | Wild   | 244.12 | 52.12  | 249.90 | 189.35-293.11 | 34.87 | 3 |
| *Edible crab – brown meat     | Wild   | 225.14 | 29.44  | 237.71 | 181.21-243.93 | 32.16 | 4 |
| *Edible crab – white meat     | Wild   | 55.39  | 15.25  | 52.38  | 41.87-71.92   | 7.91  | 3 |
| King prawn                    | Farmed | 6.50   | 1.57   | 6.73   | 4.57-7.97     | 0.93  | 4 |
| Langoustines (Norway lobster) | Wild   | 341.68 | 110.76 | 360.02 | 206.48-440.17 | 48.81 | 4 |
| Tiger prawn                   | Farmed | 7.27   | 3.36   | 7.08   | 3.81-11.13    | 1.04  | 4 |

**Supplementary Table S1 Cont.**

| Common name               | Wild/<br>Farmed | Iodine (µg.100 g <sup>-1</sup> flesh) |       |        |                    | % RWI,<br>140g serv-<br>ing | n |
|---------------------------|-----------------|---------------------------------------|-------|--------|--------------------|-----------------------------|---|
|                           |                 | Mean                                  | SD    | Median | Range<br>(min-max) |                             |   |
| SHELLFISH Cont.           |                 |                                       |       |        |                    |                             |   |
| <i>Bivalves</i>           |                 |                                       |       |        |                    |                             |   |
| Atlantic deep-sea scallop | Wild            | 6.19                                  | 0.54  | 6.36   | 5.59-6.63          | 0.88                        | 3 |
| Atlantic razor clam       | Wild            | 26.85                                 | 18.86 | 15.67  | 11.02-50.60        | 3.84                        | 5 |
| *Blue mussels             | Wild            | 157.61                                | 86.60 | 153.23 | 82.51-241.45       | 22.52                       | 4 |
| Blue mussels              | Farmed          | 104.82                                | 43.92 | 86.86  | 75.92-169.64       | 14.97                       | 4 |
| *Chilean mussels          | Farmed          | 129.56                                | 8.84  | 129.27 | 119.77-139.94      | 18.51                       | 4 |

|                       |        |        |       |        |               |       |   |
|-----------------------|--------|--------|-------|--------|---------------|-------|---|
| Clams                 | Wild   | 82.58  | 7.89  | 83.06  | 74.46-90.23   | 11.80 | 3 |
| *Common edible cockle | Wild   | 126.89 | 20.67 | 127.88 | 104.86-146.92 | 18.13 | 4 |
| Green-lipped mussels  | Farmed | 70.56  | 13.69 | 69.85  | 59.13-84.12   | 10.08 | 4 |
| King scallop (+ roe)  | Wild   | 18.90  | 7.27  | 19.06  | 11.54-26.08   | 2.70  | 3 |
| Pacific oyster        | Farmed | 63.11  | 19.22 | 54.89  | 49.37-85.07   | 9.02  | 3 |
| Patagonian scallop    | Wild   | 7.97   | 2.92  | 6.81   | 5.80-11.29    | 1.14  | 3 |

## References

- 6 Scientific Advisory Committee on Nutrition (SACN). Statement on Iodine and Health, February 2014. Available online: [https://assets.publishing.service.gov.uk/government/uploads/system/uploads/attachment\\_data/file/339439/SACN\\_Iodine\\_and\\_Health\\_2014.pdf](https://assets.publishing.service.gov.uk/government/uploads/system/uploads/attachment_data/file/339439/SACN_Iodine_and_Health_2014.pdf) (accessed on 10 March 2021).
- 28 Scientific Advisory Committee on Nutrition (SACN) and Committee on Toxicity (COT). *Advice on Fish Consumption: Benefits and Risks*; The Stationary Office: Norwich, UK, 2004; p. 222.
